# Supplementary material
Source: PubMed Central journal article supplement (PMC8237689)
Supplement: pnas.2025236118.sapp.pdf [file pnas.2025236118.sapp.pdf]

1

## 2 **Supplementary Information for**

3 **Compressed vessels bias red blood cell partitioning at bifurcations in a**  
4 **hematocrit-dependent manner: implications in tumor blood flow**

5 **Romain Enjalbert, David Hardman, Timm Krüger and Miguel O. Bernabeu**

6 **Timm Krüger and Miguel O. Bernabeu.**

7 **E-mail: [tim.krueger@ed.ac.uk](mailto:tim.krueger@ed.ac.uk), [miguel.bernabeu@ed.ac.uk](mailto:miguel.bernabeu@ed.ac.uk)**

### 8 **This PDF file includes:**

- 9     Supplementary text
- 10    Figs. S1 to S5
- 11    Tables S1 to S2
- 12    SI References

## 13 Supporting Information Text

14 The supplementary information text contains additional details of the model for particulate blood flow.

## 15 Details of the numerical methods

16 In the following, the numerical model for red blood cells (RBCs) suspended in blood plasma is summarised. The model has been  
17 shown to recover the most important properties of red blood cell flow relevant to this study, *i.e.* the motion and deformation of  
18 individual RBCs and dense suspensions of RBCs (1, 2), and the partitioning of RBCs in a semi-dilute suspension within a  
19 network (3). The interested reader is referred to (4, 5) for more details about the method.

20 **Fluid model.** The lattice-Boltzmann method (LBM) is used to numerically solve the Navier-Stokes equation for our Newtonian  
21 fluid model; see (6) for more details on the LBM. Our LBM algorithm employs the D3Q19 lattice, the Bhatnagar-Gross-Krook  
22 collision operator, Guo's forcing scheme (7), the Bouzidi-Firdaouss-Lallemand no-slip boundary condition at the walls (8), and  
23 the Ladd velocity boundary condition for inlets/outlets (9). The parameters for the LBM are provided in Table S1.

24 **Red blood cell model.** Each RBC is modelled as a biconcave discocyte with shape parameters taken from physiological RBCs  
25 (10). The RBC model includes a membrane energy,

$$26 \quad W = W^S + W^B + W^A + W^V, \quad [1]$$

27 where each superscript  $S$ ,  $B$ ,  $A$ ,  $V$  denotes the source of the energy contribution, strain, bending, area and volume energies,  
28 respectively. Our model uses the surface strain energy density for RBCs as proposed by Skalak et al. (11),

$$29 \quad W^S = \oint w^S dA, \quad w^S = \frac{\kappa_s}{12}(I_1^2 + 2I_1 - 2I_2) + \frac{\kappa_\alpha}{12}I_2^2, \quad [2]$$

30 where  $\kappa_s$  and  $\kappa_\alpha$  are the elastic shear and dilation moduli.  $\kappa_s$  is set through the capillary number and  $\kappa_\alpha$  is set to maintain  
31 near incompressibility of the RBC membrane.  $I_1$  and  $I_2$  can be calculated from the local stretch ratios; see (5) for details. The  
32 strain energy  $W^S$  is discretised as

$$33 \quad W^S = \sum_{j=1}^{N_f} A_j^{(0)} w_j^S, \quad [3]$$

34 where each RBC membrane is approximated by a mesh of  $N_f$  triangular faces  $j$  of initial undeformed area  $A_j^{(0)}$ . The remaining  
35 three energy contributions (bending, surface area, volume) are calculated through

$$36 \quad W^B = \sqrt{3}\kappa_B \sum_{\langle i,j \rangle} (\theta_{i,j} - \theta_{i,j}^{(0)})^2, \quad [4]$$

37 where  $\theta_{i,j}$  is the angle between two neighbouring triangular faces,

$$38 \quad W^A = \frac{\kappa_A (A - A^{(0)})^2}{2A^{(0)}}, \quad [5]$$

39 where  $A$  is the surface area of the RBC,

$$40 \quad W^V = \frac{\kappa_V (V - V^{(0)})^2}{2V^{(0)}}. \quad [6]$$

41 where  $V$  is the volume of the RBC. The superscript (0) denotes values for an undeformed RBC.  $\kappa_B$ ,  $\kappa_A$ ,  $\kappa_V$  are the bending,  
42 surface area and volume moduli.  $\kappa_B$  is known from experiments, whereas  $\kappa_A$  and  $\kappa_V$  are set to achieve conservation of the  
43 surface area and volume of each RBC (4, 5). The forces acting on each vortex of an RBC mesh are calculated through the  
44 principle of virtual work:

$$45 \quad \vec{F}_i = -\frac{\delta W}{\delta \vec{x}_i}, \quad [7]$$

46 where  $\vec{F}_i$  is the force acting on the  $i^{th}$  node,  $W$  is the total energy functional, and  $\vec{x}_i$  is the position of the node. The parameters  
47 for the RBC model are provided in Table S2.

48 **Fluid-cell interaction.** The RBC membrane is coupled to the fluid through the immersed boundary method (IBM) (4). After  
49 the forces acting on each vortex of the mesh of an RBC have been calculated, these forces are spread to the fluid lattice:

$$50 \quad \vec{f}(\vec{X}, t) = \sum_i \vec{F}_i(t) \delta(\vec{X} - \vec{x}_i(t)), \quad [8]$$

51 where  $\vec{f}(\vec{X}, t)$  is the force density acting on the fluid node at position  $\vec{X}$  and time  $t$ ,  $\vec{F}_i(t)$  is the force acting on the  $i^{th}$   
52 node, and  $\delta(\vec{X} - \vec{x}_i(t))$  is a discretised delta function. We use a three-point stencil for the discretised delta function (4). The  
53 force that is spread from the RBC mesh to the fluid lattice is considered as external force during the next lattice-Boltzmann

54 time step. Once the flow field has been updated at time  $t + \Delta t$  through the LBM, the fluid velocity is interpolated at each  
55 RBC mesh vortex:

$$56 \quad \vec{u}_i(t + \Delta t) = \sum_{\vec{X}} \vec{u}(\vec{X}, t + \Delta t) \delta(\vec{X} - \vec{x}_i(t)), \quad [9]$$

57 where  $\vec{u}_i(t + \Delta t)$  is the velocity of the  $i^{\text{th}}$  RBC mesh node at time  $t + \Delta t$  and  $\vec{u}(\vec{X}, t + \Delta t)$  is the updated velocity at a fluid  
58 lattice point  $\vec{X}$ . RBC mesh vortices are updated according to

$$59 \quad \vec{x}_i(t + \Delta t) = \vec{x}_i(t) + \vec{u}_i(t + \Delta t) \Delta t, \quad [10]$$

60 and the overall algorithm proceeds to the next iteration.

**Table S1. Simulation parameters used for the lattice-Boltzmann method.**

| Parameter               | Symbol     | Unit            | Value                 |
|-------------------------|------------|-----------------|-----------------------|
| Voxel size              | $\Delta x$ | $\mu\text{m}$   | 0.6667                |
| Timestep                | $\Delta t$ | s               | $7.41 \times 10^{-8}$ |
| Relaxation time         | $\tau$     | dimensionless   | 1                     |
| Fluid viscosity         | $\mu$      | mPa s           | 1                     |
| RBC cytoplasm viscosity | $\mu$      | mPa s           | 1                     |
| Fluid density           | $\rho$     | $\text{kg/m}^3$ | 1000                  |

**Table S2. Parameters used for the red blood cell model. All values are given in simulation units, unless specified otherwise.**

| Parameter                   | Symbol                                     | Value                       |
|-----------------------------|--------------------------------------------|-----------------------------|
| Strain modulus              | $\kappa_s$                                 | depends on capillary number |
| Dilation modulus            | $\kappa_\alpha$                            | 0.5                         |
| Bending modulus             | $\kappa_B$                                 | depends on capillary number |
| Surface area modulus        | $\kappa_A$                                 | 1                           |
| Volume modulus              | $\kappa_V$                                 | 1                           |
| Föppl-von Kármán number     | $\Gamma = \kappa_B / (\kappa_S r_{RBC}^2)$ | 1/400                       |
| Number of faces in RBC mesh | $N_f$                                      | 720                         |
| RBC radius                  | $r_{RBC}$                                  | 4 $\mu\text{m}$             |

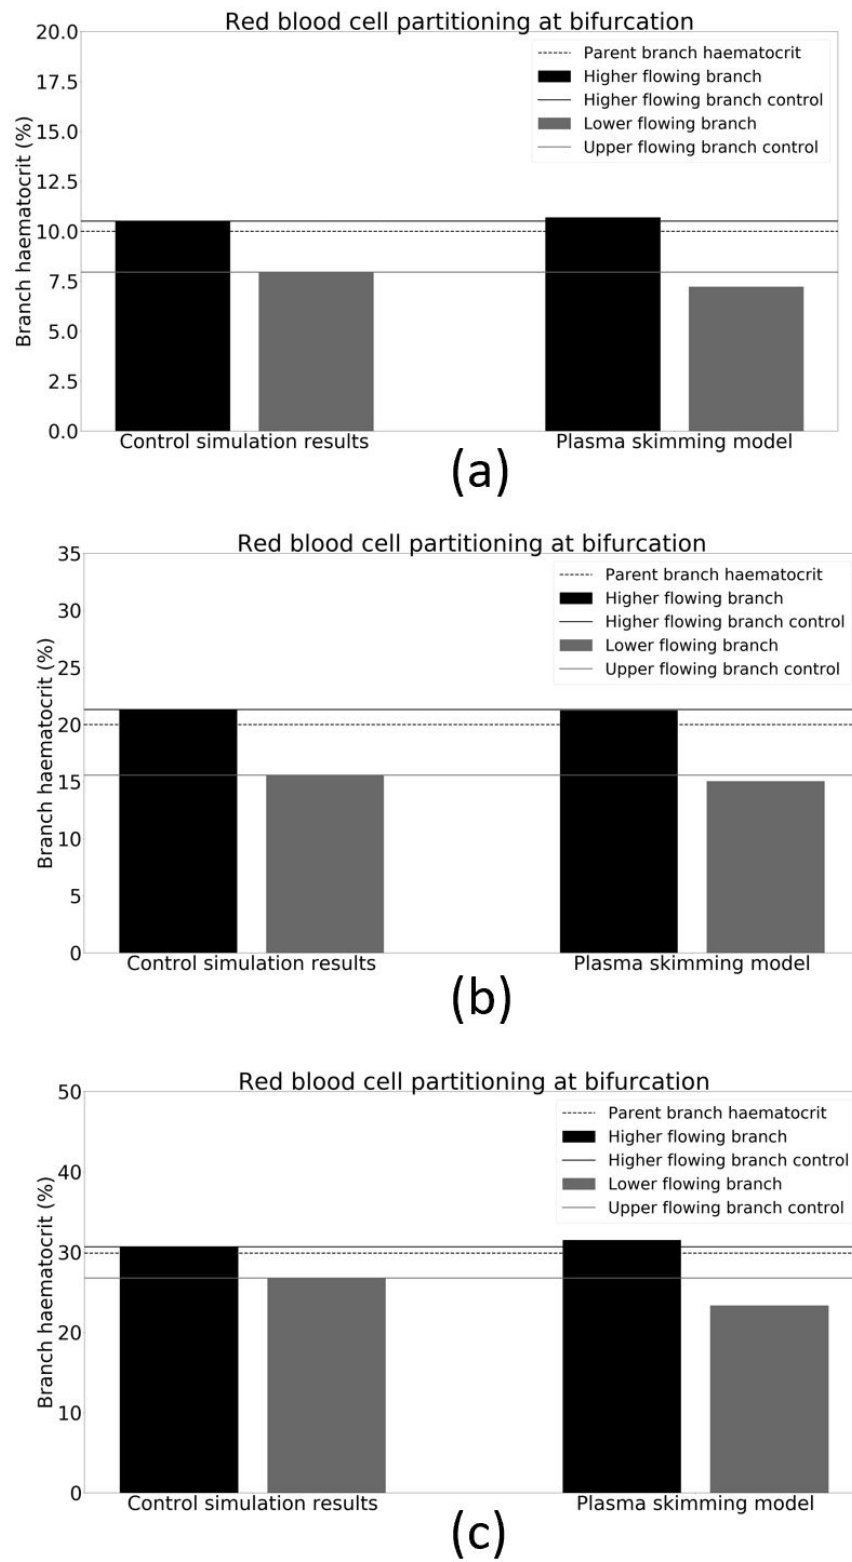

**Fig. S1.** Comparison of simulation control data with empirical plasma skimming model (12, 13) with a flow ratio of 4. (a) Simulation at  $H_d = 10\%$ . (b) Simulation at  $H_d = 20\%$ . (c) Simulation at  $H_d = 30\%$ .

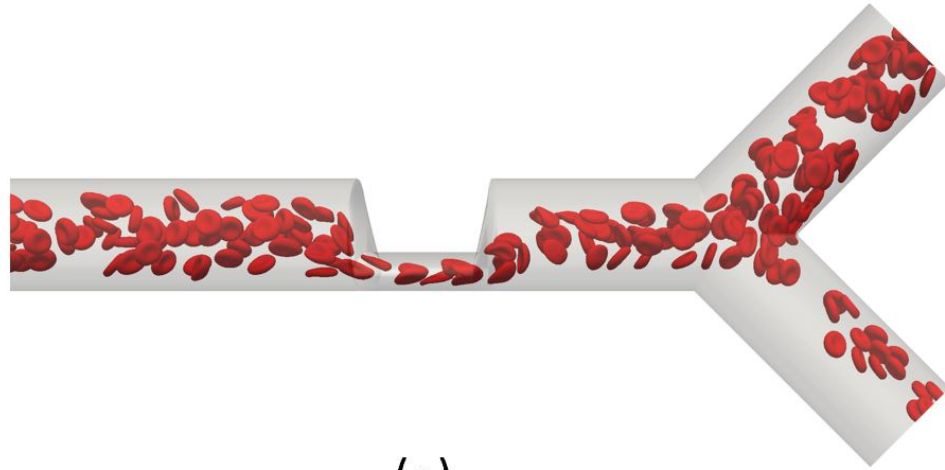

(a)

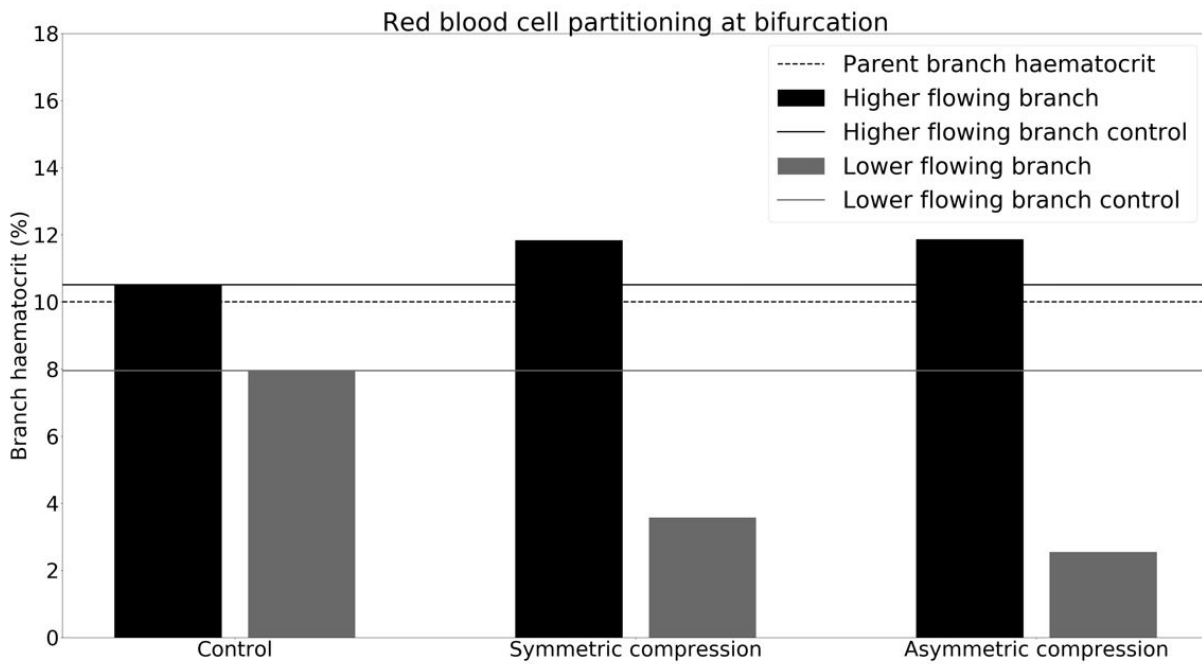

(b)

**Fig. S2.** Phase separation of child branches after bifurcation at  $H_d = 10\%$  comparing effect of compression asymmetry. (a) Snapshot of the asymmetric short geometry with the same dimensions as the short geometry. (b) From left to right are the hematocrit of the child branches for a control geometry, a symmetric compression, and an asymmetric compression (a). Results show a negligible difference between a symmetric and asymmetric geometry. In black is the higher flowing child branch and in grey the lower flowing child branch. The solid lines are the control discharge hematocrits. The dotted line illustrates the discharge hematocrit of the parent branch.

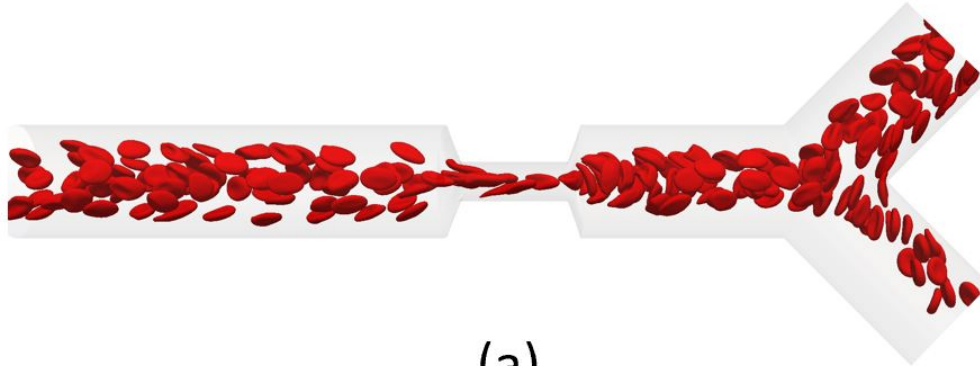

(a)

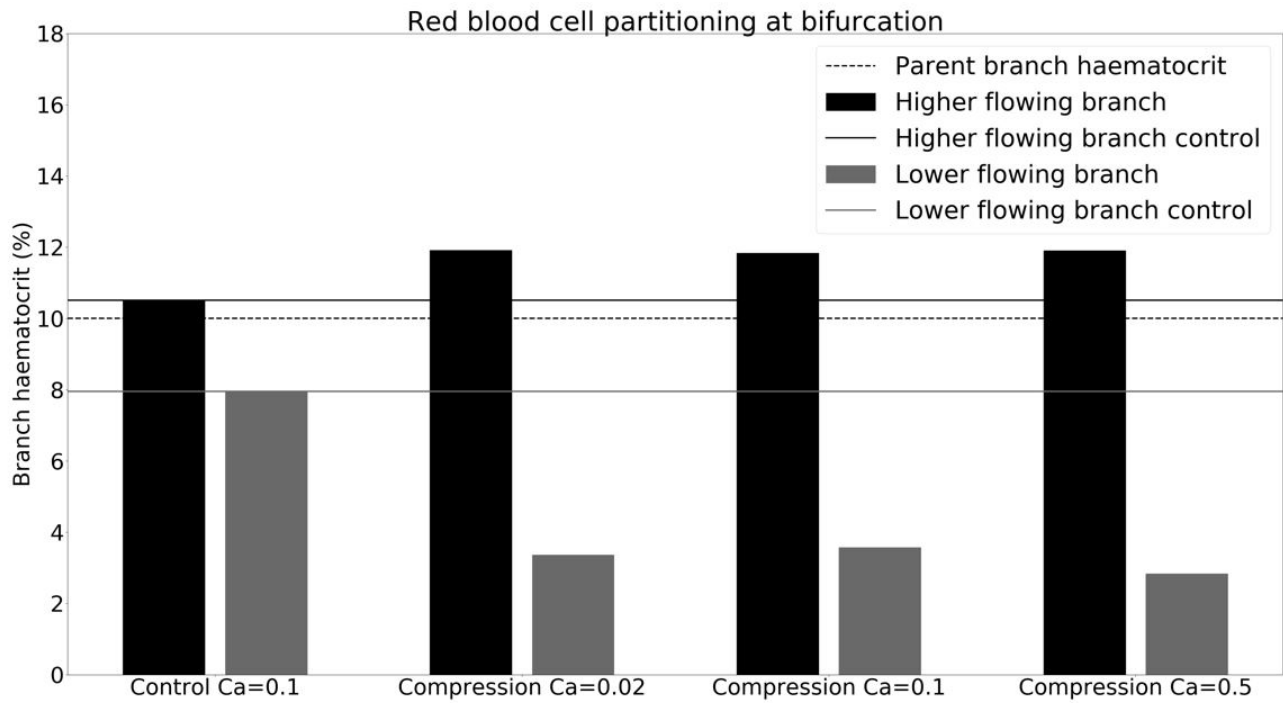

(b)

**Fig. S3.** Phase separation of child branches after bifurcation at  $H_d = 10\%$ , comparing effect of different channel flow rates (increasing capillary number denotes increasing flow rate). (a) Snapshot of the short compression with a higher channel flow rate and a capillary number of 0.5. (b) haematocrit of the child branches for a control geometry, on the left, and a compression geometry (a) at three different capillary numbers. In black is the higher flowing child branch and in grey the lower flowing child branch. The solid lines are the control discharge haematocrits. The dotted line illustrates the discharge haematocrit of the parent branch.



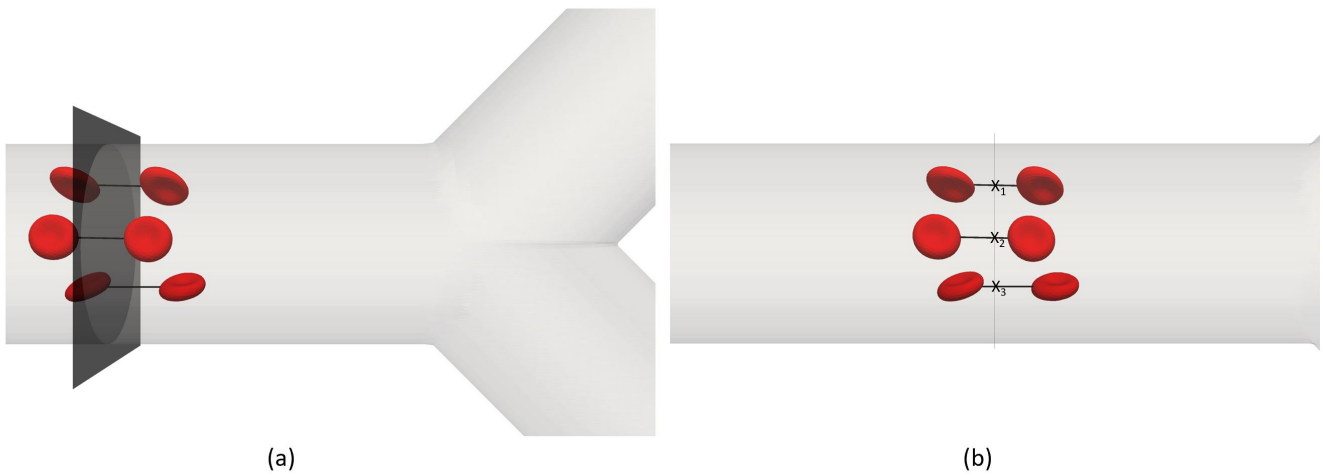

**Fig. S4.** (a) Three RBCs before and after a plane of interest. Lines indicate RBC trajectories, assumed as straight. (b) Side view as each cell crosses the plane at a given coordinate  $(x, y, z)$ . The RMSD is calculated in the compression axis (here seen as height of channel) by setting  $x_0$  as the channel centreline (always zero) and  $x_i$  as the height coordinate of the RBC as it crosses the plane. This measures the distribution in the height of the channel. For illustration purposes only three cells are shown, whereas several hundred are accounted for.

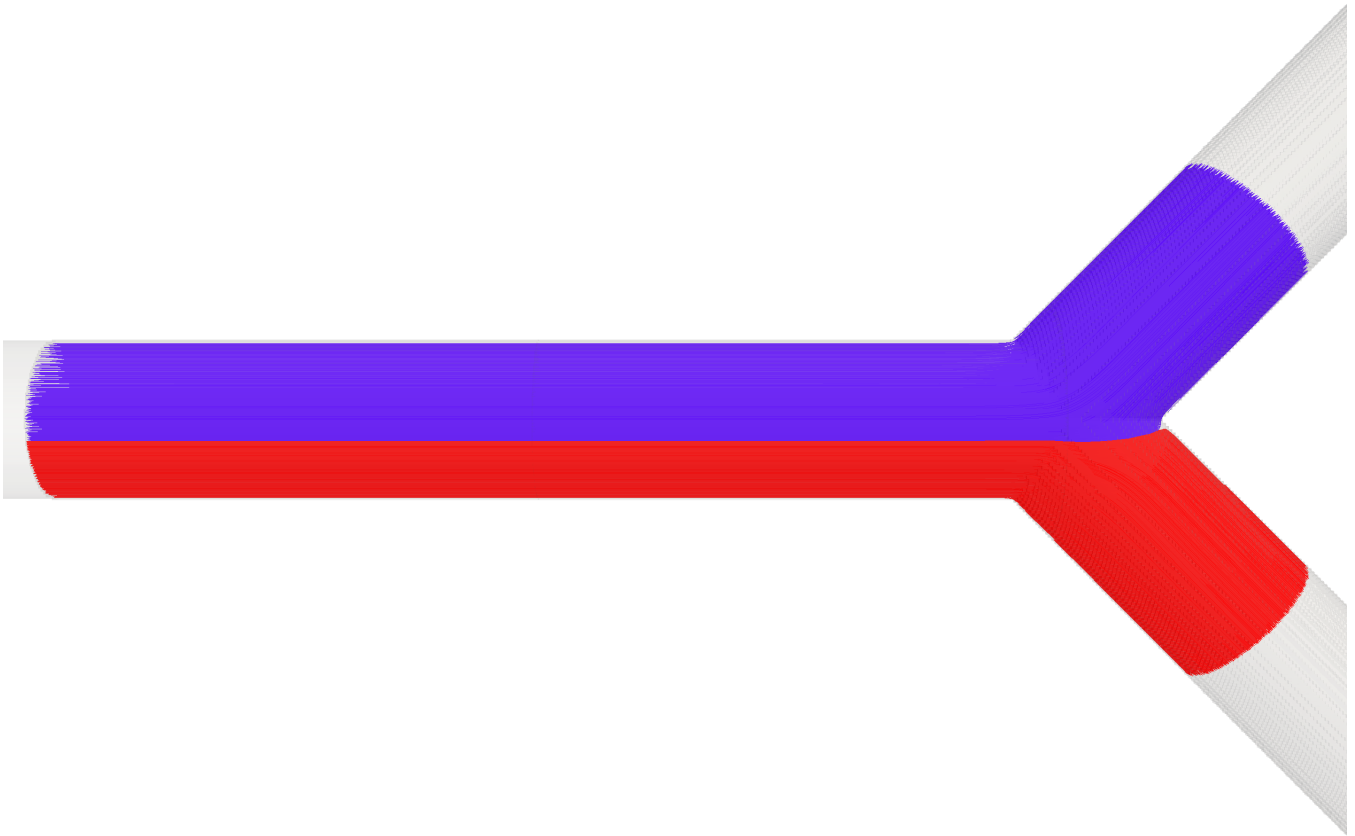

**Fig. S5.** Intuition for separatrix. Blue/red lines are streamlines ending in the top/bottom child branch, respectively. The separatrix is the surface separating the blue from the red streamlines on the plane.

61 **References**

- 62 1. T Krueger, margination and near-wall dynamics. *Rheol. Acta* (2015).  
63 2. T Krüger, D Holmes, PV Coveney, Deformability-based red blood cell separation in deterministic lateral displacement  
64 devices-A simulation study. *Biomicrofluidics* **8** (2014).  
65 3. Q Zhou, J Fidalgo, MO Bernabeu, MSN Oliveira, T Krüger, Emergent cell-free layer asymmetry and biased haematocrit  
66 partition in a biomimetic vascular network of successive bifurcations. *Soft Matter* (2021).  
67 4. T Krüger, F Varnik, D Raabe, Efficient and accurate simulations of deformable particles immersed in a fluid using a  
68 combined immersed boundary lattice Boltzmann finite element method. *Comput. Math. with Appl.* **61**, 3485–3505 (2011).  
69 5. Timm Krüger, Ph.D. thesis (2012).  
70 6. T Krueger, et al., *The lattice boltzmann method, principles and practice*. (Springer) No. 207, pp. 1–705 (2017).  
71 7. Z Guo, C Zheng, B Shi, Discrete lattice effects on the forcing term in the lattice Boltzmann method. *Phys. Rev. E - Stat.*  
72 *Physics, Plasmas, Fluids, Relat. Interdiscip. Top.* **65**, 1–6 (2002).  
73 8. M Bouzidi, M Firdaouss, P Lallemand, Momentum transfer of a Boltzmann-lattice fluid with boundaries. *Phys. Fluids* **13**,  
74 3452–3459 (2001).  
75 9. AJ Ladd, Numerical Simulations of Particulate Suspensions Via a Discretized Boltzmann Equation. Part 1. Theoretical  
76 Foundation. *J. Fluid Mech.* **271**, 285–309 (1994).  
77 10. E Evans, YC Fung, Improved Measurements of the Erythrocyte Geometry. *Microvasc. research* **4**, 335–347 (1972).  
78 11. R Skalak, A Tozeren, RP Zarda, S Chien, Strain Energy Function of Red Blood Cell Membranes. *Biophys. J.* **13**, 245–264  
79 (1973).  
80 12. A Pries, K Ley, M Classen, P Gaehtgens, Red Cell Distribution at Microvascular. *Microvasc. research* **38**, 81–101 (1989).  
81 13. AR Pries, TW Secomb, Microvascular blood viscosity in vivo and the endothelial surface layer. *Am. J. Physiol. - Hear.*  
82 *Circ. Physiol.* **289**, 2657–2664 (2005).
